# Supplementary material for: Influences of Trypsin Pretreatment on the Structures, Composition, and Functional Characteristics of Skin Gelatin of Tilapia, Grass Carp, and Sea Perch
Source: MDPI journal article supplement (doi:10.3390/md21080423), 2023-07-25
Supplement: s1 [file s1]

Supplementary Table

Table S1 The identification results of the fish skin gelatin collagen and collagen-associated proteins by High performance liquid chromatography-mass spectrometry (HPLC-MS)

| Items          | Sample                                                       |                              |                                         |
|----------------|--------------------------------------------------------------|------------------------------|-----------------------------------------|
|                | Sea perch skin gelatin                                       | Tilapia skin gelatin         | Grass carp skin gelatin                 |
| Collagen types | Collagen, type I, alpha 1a                                   | Collagen alpha chain         | Collagen alpha chain                    |
|                | Collagen, type I, alpha 1b                                   | Collagen, type I, alpha 1b   | Procollagen type I alpha 2 chain        |
|                | Collagen, type I, alpha 2                                    | Collagen type II, alpha-1b   | Collagen, type I, alpha 1a              |
|                | Collagen, type II, alpha 1b                                  | Collagen, type VI, alpha 1   | Collagen, type I, alpha 1b              |
|                | Collagen type II, alpha-1b                                   | Collagen, type VI, alpha 2   | Collagen type II, alpha-1b              |
|                | Collagen, type IV, alpha 5 (Alport syndrome)                 | Collagen, type XII, alpha 1a | Collagen, type II, alpha 1b             |
|                | Procollagen, type V, alpha 1 (Fragment)                      | Collagen, type XIV, alpha 1a | Collagen, type IV, alpha 6              |
|                | Collagen, type V, alpha 2a (Fragment)                        | Biglycan (Fragment)          | Procollagen, type V, alpha 1 (Fragment) |
|                | Collagen, type VI, alpha 1                                   |                              | Collagen, type V, alpha 2b              |
|                | Collagen, type VI, alpha 2                                   |                              | Collagen, type V, alpha 3a              |
|                | Collagen, type VI, alpha 3 (Fragment)                        |                              | Collagen, type VI, alpha 1              |
|                | Collagen, type VI, alpha 3                                   |                              | Collagen, type VI, alpha 2              |
|                | Collagen, type XII, alpha 1a                                 |                              | Collagen, type VI, alpha 3 (Fragment)   |
|                | Collagen, type XII, alpha 1b                                 |                              | Collagen, type VI, alpha 3              |
|                | Collagen, type XIV, alpha 1a                                 |                              | Collagen, type VII, alpha 1             |
|                | Collagen type XV-B alpha 1 chain                             |                              | Collagen type XI alpha 2 (Fragment)     |
|                | Collagen type XXVIII alpha 2 a                               |                              | Collagen, type XII, alpha 1b            |
|                | Decorin                                                      |                              | Collagen, type XIV, alpha 1a            |
|                | Col2a1a protein                                              |                              | Collagen, type XXI, alpha 1             |
|                | Lumican (Fragment)                                           |                              | Collagen alpha-1(XXVII) chain B         |
|                | Proline/arginine-rich end leucine-rich repeat protein        |                              | Col2a1a protein                         |
|                | Collagen and calcium-binding EGF domain-containing protein 1 |                              | Si:ch211-106n13.3                       |
|                |                                                              |                              | Si:ch211-157b11.8                       |
|                |                                                              |                              | Metalloendopeptidase                    |
